# Supplementary material for: Twist1 Regulates Vimentin through Cul2 Circular RNA to Promote EMT in Hepatocellular Carcinoma
Source: Oxford University Press journal article supplement (doi:10.1158/0008-5472.can-17-3009), 2018-05-29
Supplement: 00085472can173009-sup-190174_3_supp_4755355_p8ph92.docx [file 00085472can173009-sup-190174_3_supp_4755355_p8ph92.docx]

**Supplementary Data**


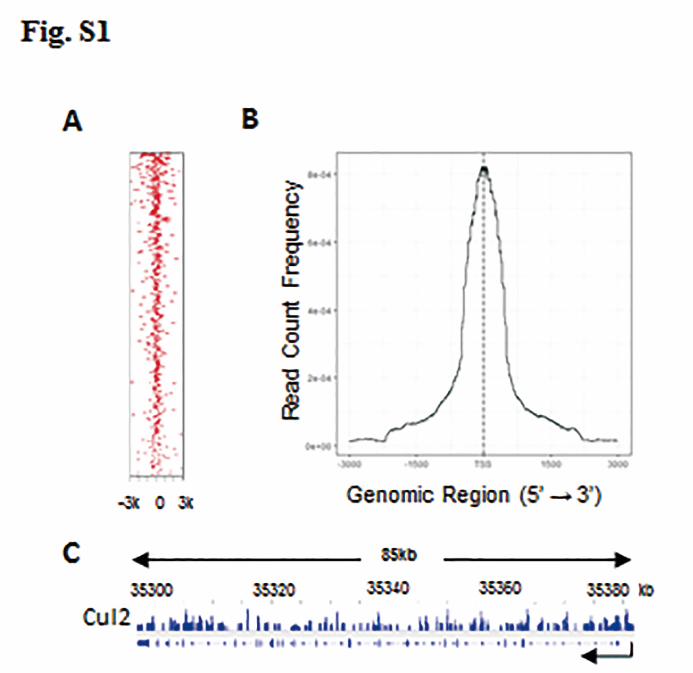


**Figure S1. Peak analyses of Twist1 ChIP-Seq Data Sets.** (A) Heat map view of signals observed in the presence of Twist1. (B) Density graph of the Twist1 peak locations in relation to the nearest transcriptional start sites (TSS). The x-axis represents the distance from the peak center to the nearest TSS, where zero is the position of the TSS. The y-axis represents the proportion of detected bindings that are located within each distance interval. (C) Twist1 ChIP-seq peak density on the Cul2.
