# Supplementary material for: Twist1 Regulates Vimentin through Cul2 Circular RNA to Promote EMT in Hepatocellular Carcinoma
Source: Oxford University Press journal article supplement (doi:10.1158/0008-5472.can-17-3009), 2018-05-29
Supplement: 00085472can173009-sup-190174_3_supp_4755356_p8ph92.docx [file 00085472can173009-sup-190174_3_supp_4755356_p8ph92.docx]

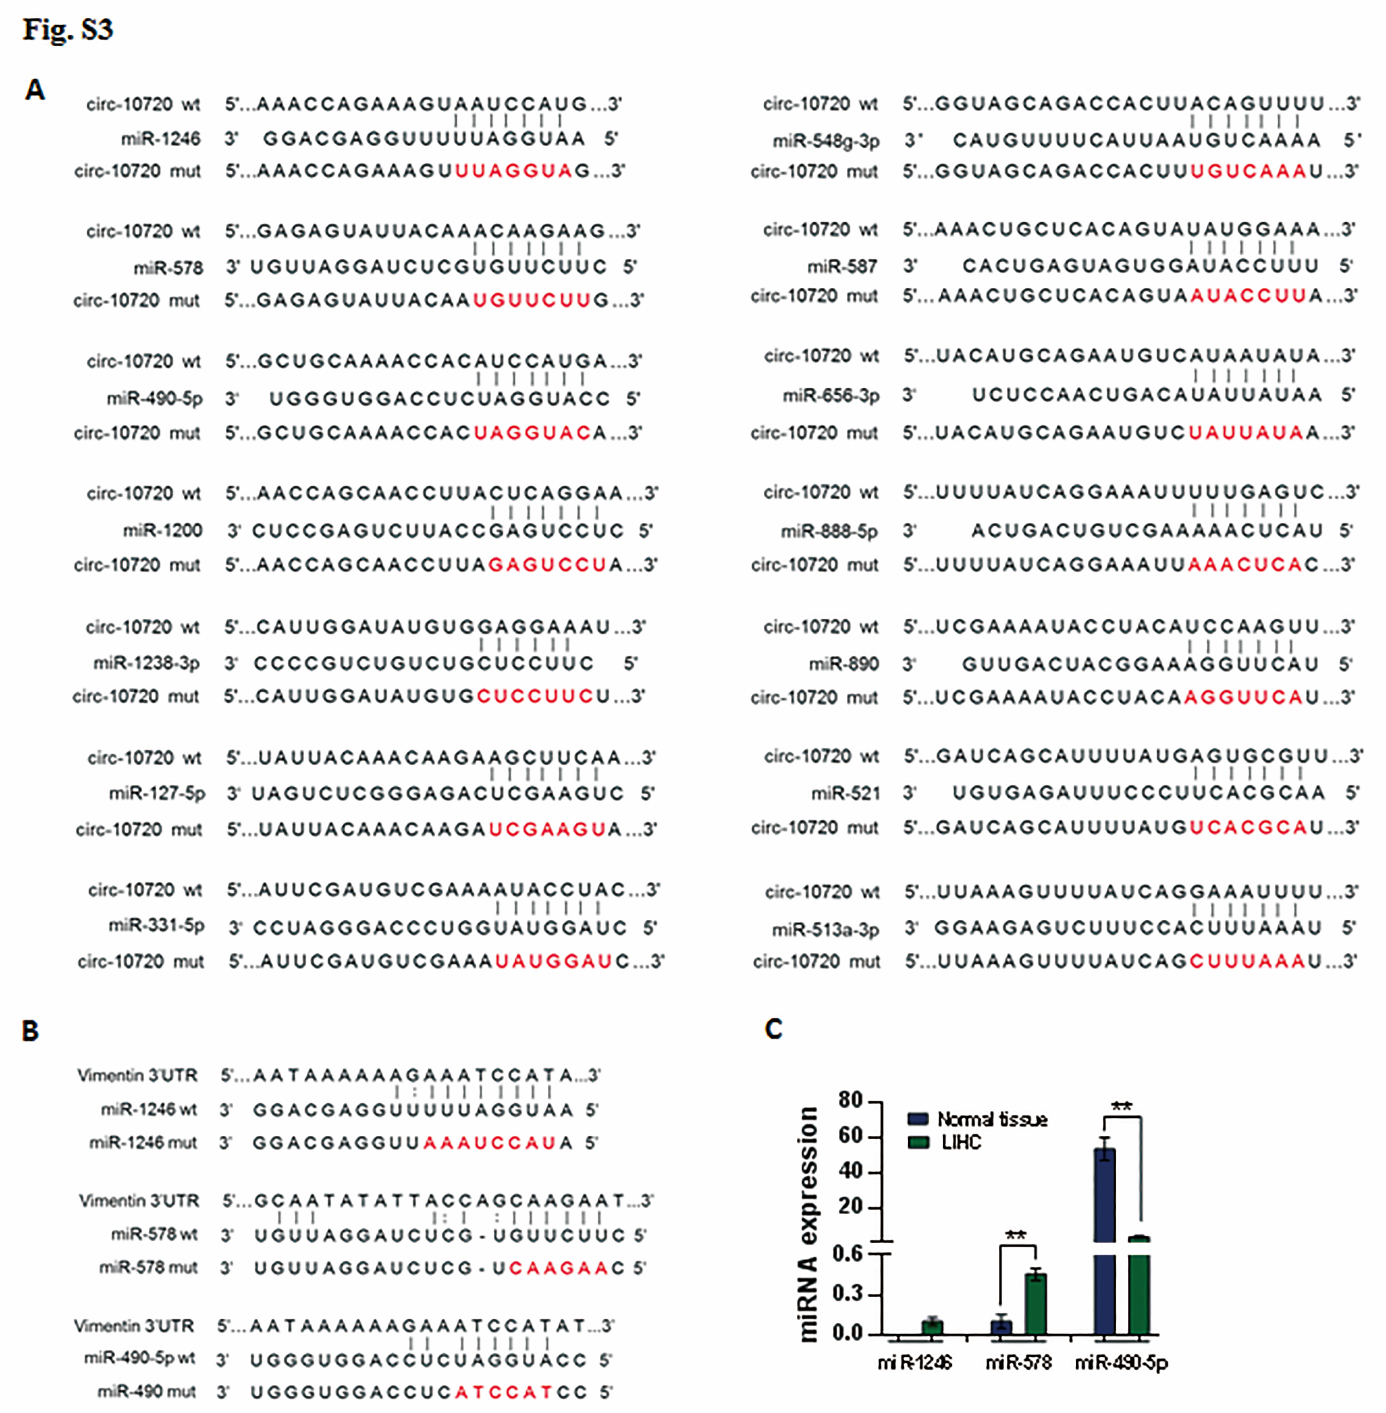


**Figure S3. The bioinformatic prediction of circ-10720-miRNAs, miRNA-Vimentin binding site.** (A)The bioinformatic prediction (circInteractome datebase) of the putative binding sites of circ-10720 with miRNAs and mutated each miRNA target site of the circ-10720 sequence. (B)The bioinformatic prediction (microRNA datebase) of the putative binding sites of Vimentin 3’-UTR with miR-1246, miR-578, miR-490-5p and mutated miRNA sequence. (C) Expression level of miR-1246, miR-578, and miR-490-5p in human normal tissues and hepatocellular carcinoma tissues.
