# Supplementary material for: Twist1 Regulates Vimentin through Cul2 Circular RNA to Promote EMT in Hepatocellular Carcinoma
Source: Oxford University Press journal article supplement (doi:10.1158/0008-5472.can-17-3009), 2018-05-29
Supplement: 00085472can173009-sup-190174_3_supp_4755357_p8ph92.docx [file 00085472can173009-sup-190174_3_supp_4755357_p8ph92.docx]

**
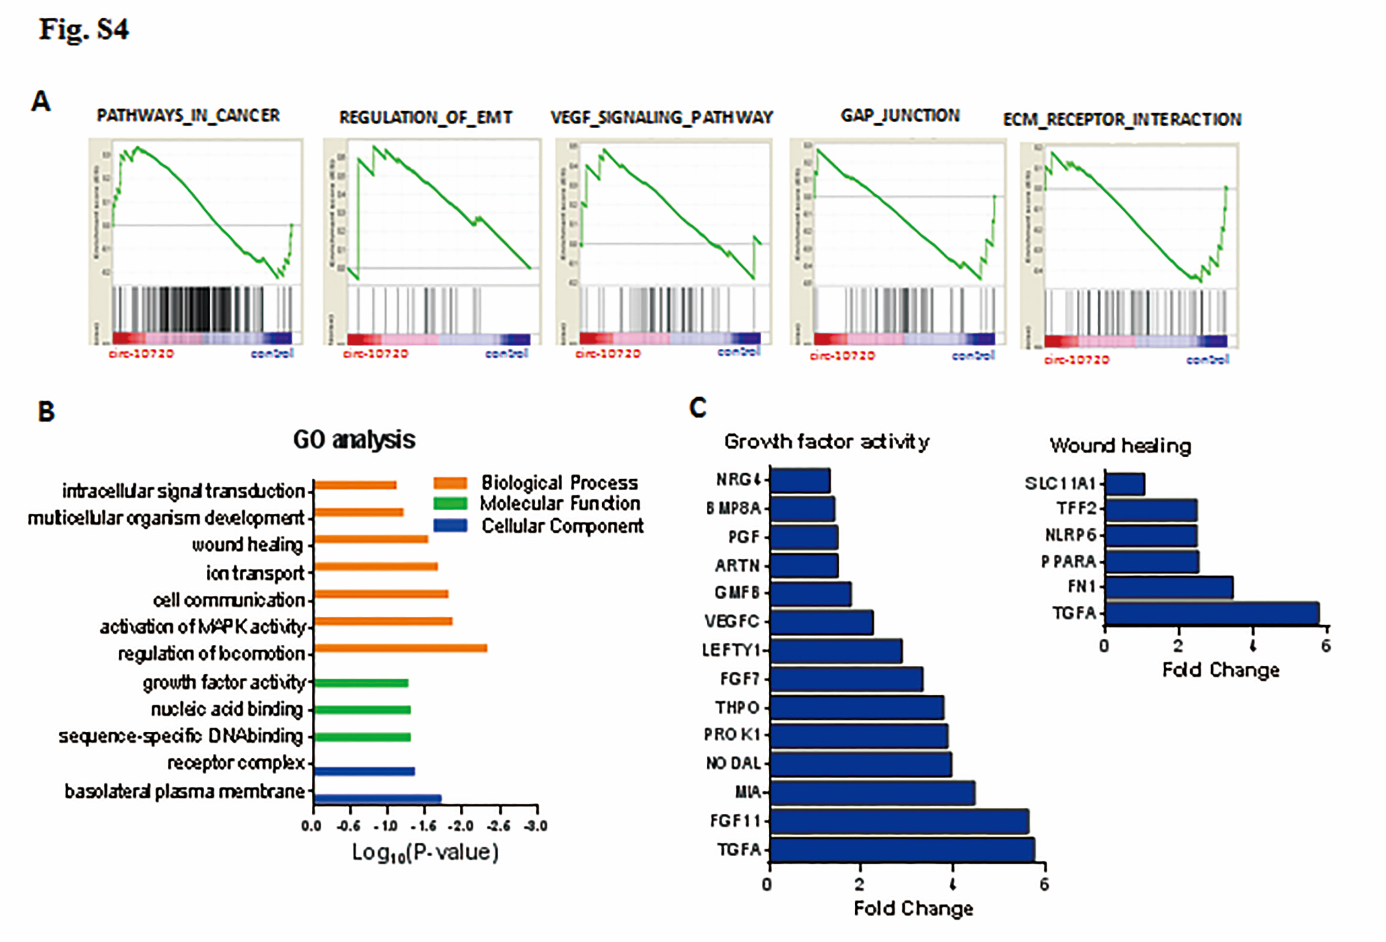
**

**Figure S4. Gene expression profile analysis by GSEA and GO established the differential expression under circ-10720 overexpression.** (A) GSEA plots for gene sets in PLC-PRF-5 cells overexpressing circ-10720 or control vectors. (B) Statistical analysis of up-regulated biological processes, molecular function, and cellular component of PLC-PRF-5 cells after circ-10720 overexpression. (C) Up-regulated genes associated with growth factor activity and wound healing in circ-10720 overexpressed PLC-PRF-5 cells were analyzed.
