# Supplementary material for: Twist1 Regulates Vimentin through Cul2 Circular RNA to Promote EMT in Hepatocellular Carcinoma
Source: Oxford University Press journal article supplement (doi:10.1158/0008-5472.can-17-3009), 2018-05-29
Supplement: 00085472can173009-sup-190174_3_supp_4755358_p8ph92.docx [file 00085472can173009-sup-190174_3_supp_4755358_p8ph92.docx]

**
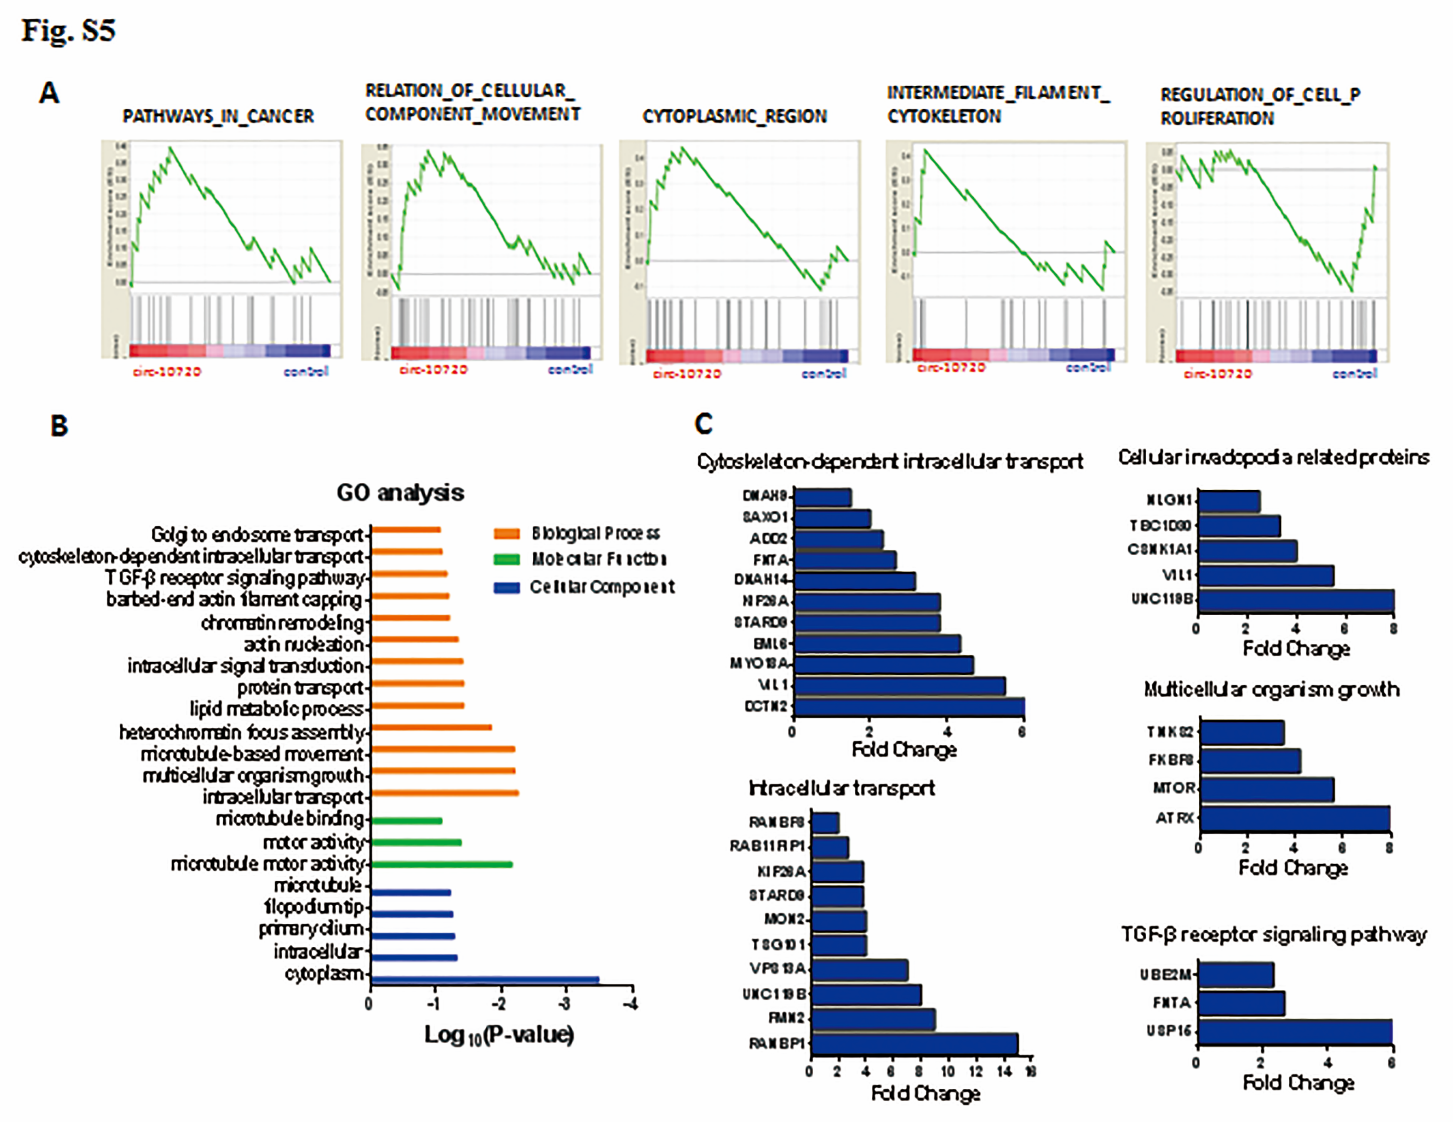
**

**Figure S5. Proteomic analysis by GSEA and GO analysis assay established the differential expression under circ-10720 overexpression.** (A) GSEA plots for the gene sets in PLC-PRF-5 cells overexpressed circ-10720 or control vectors. (B) Statistical analysis of the up-regulated biological processes, molecular function and cellular component of PLC-PRF-5 cells after circ-10720 overexpression. (C) Up-regulated genes associated with intracellular transport, invadopodia proteins, TGF-β receptor signaling pathways and so on in circ-10720 overexpressed PLC-PRF-5 cells was analyzed.
