# Supplementary material for: Twist1 Regulates Vimentin through Cul2 Circular RNA to Promote EMT in Hepatocellular Carcinoma
Source: Oxford University Press journal article supplement (doi:10.1158/0008-5472.can-17-3009), 2018-05-29
Supplement: 00085472can173009-sup-190174_3_supp_4755359_p8ph92.docx [file 00085472can173009-sup-190174_3_supp_4755359_p8ph92.docx]

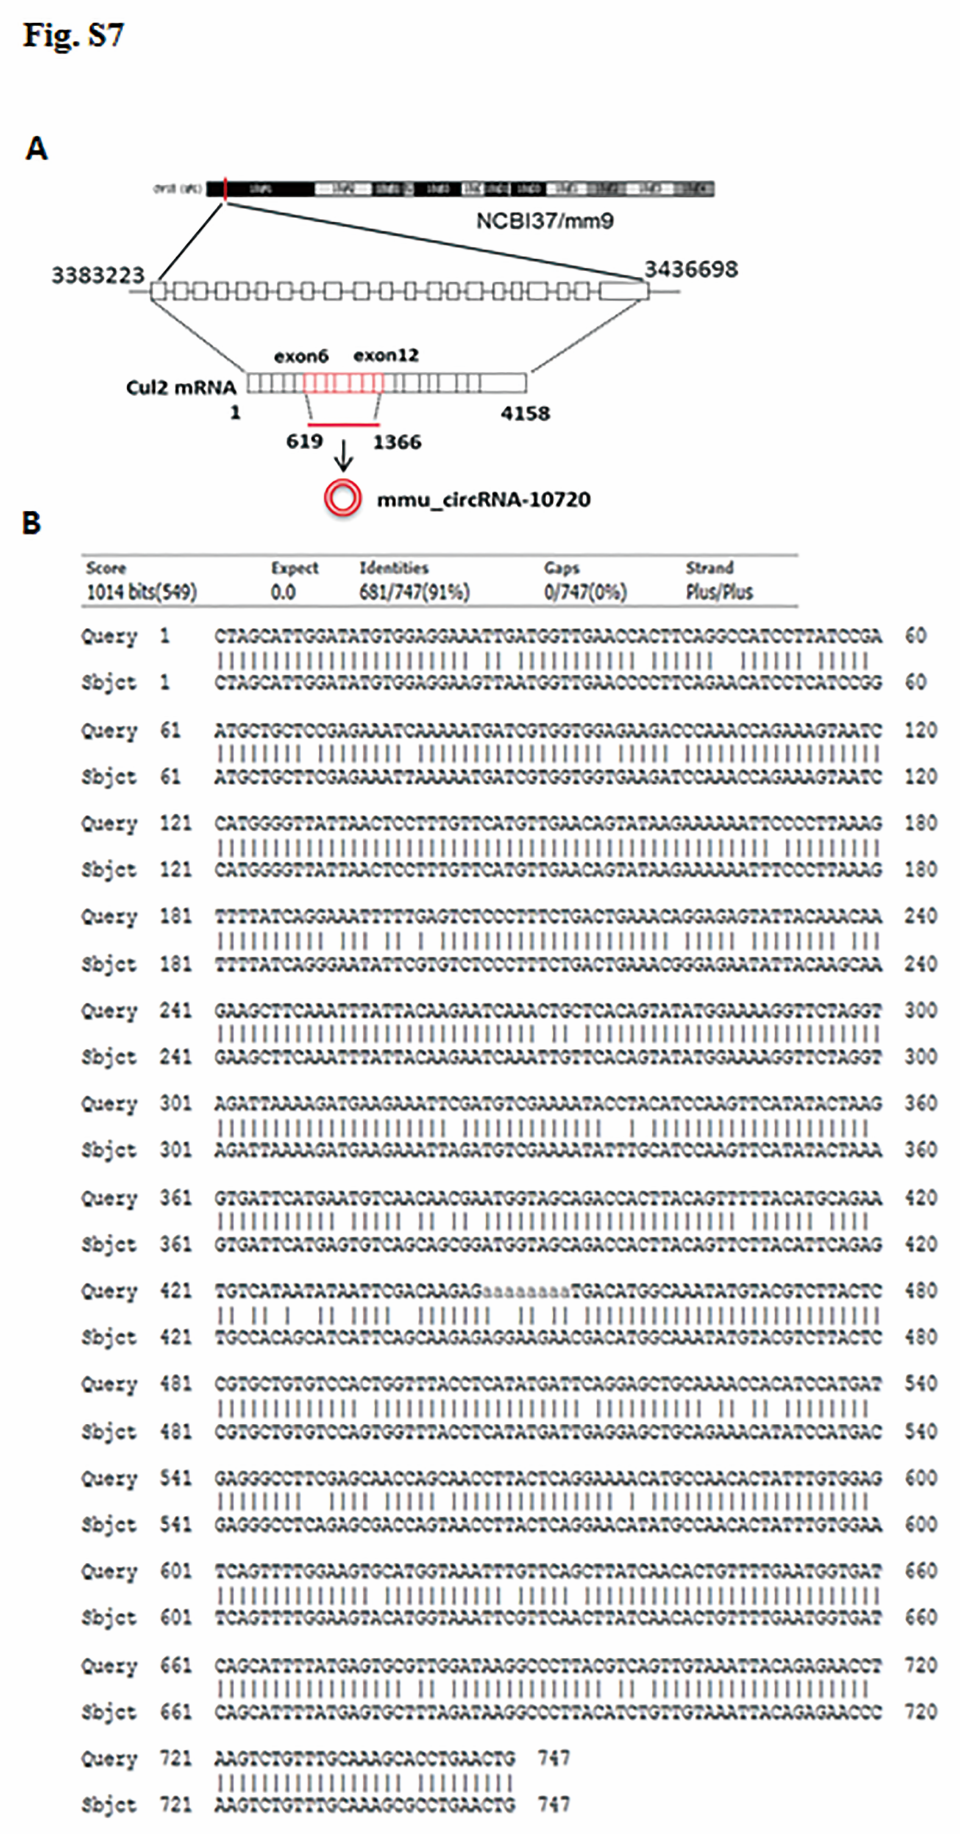


**Figure S7. The formation and sequences of circ-10720 in mice.** (A)Schematic diagram of the formation of circRNA-10720 in mice. (B) The sequence alignment of circRNA-10720 in human (Query 1) and mice (Sbjct 1).
